# Supplementary material for: Situational Use of Child Restraint Systems and Carpooling Behaviors in Parents and Caregivers
Source: MDPI journal article supplement (doi:10.3390/ijerph15081788), 2018-08-20

**Figure S1: Overall Analytic Sample n=783**

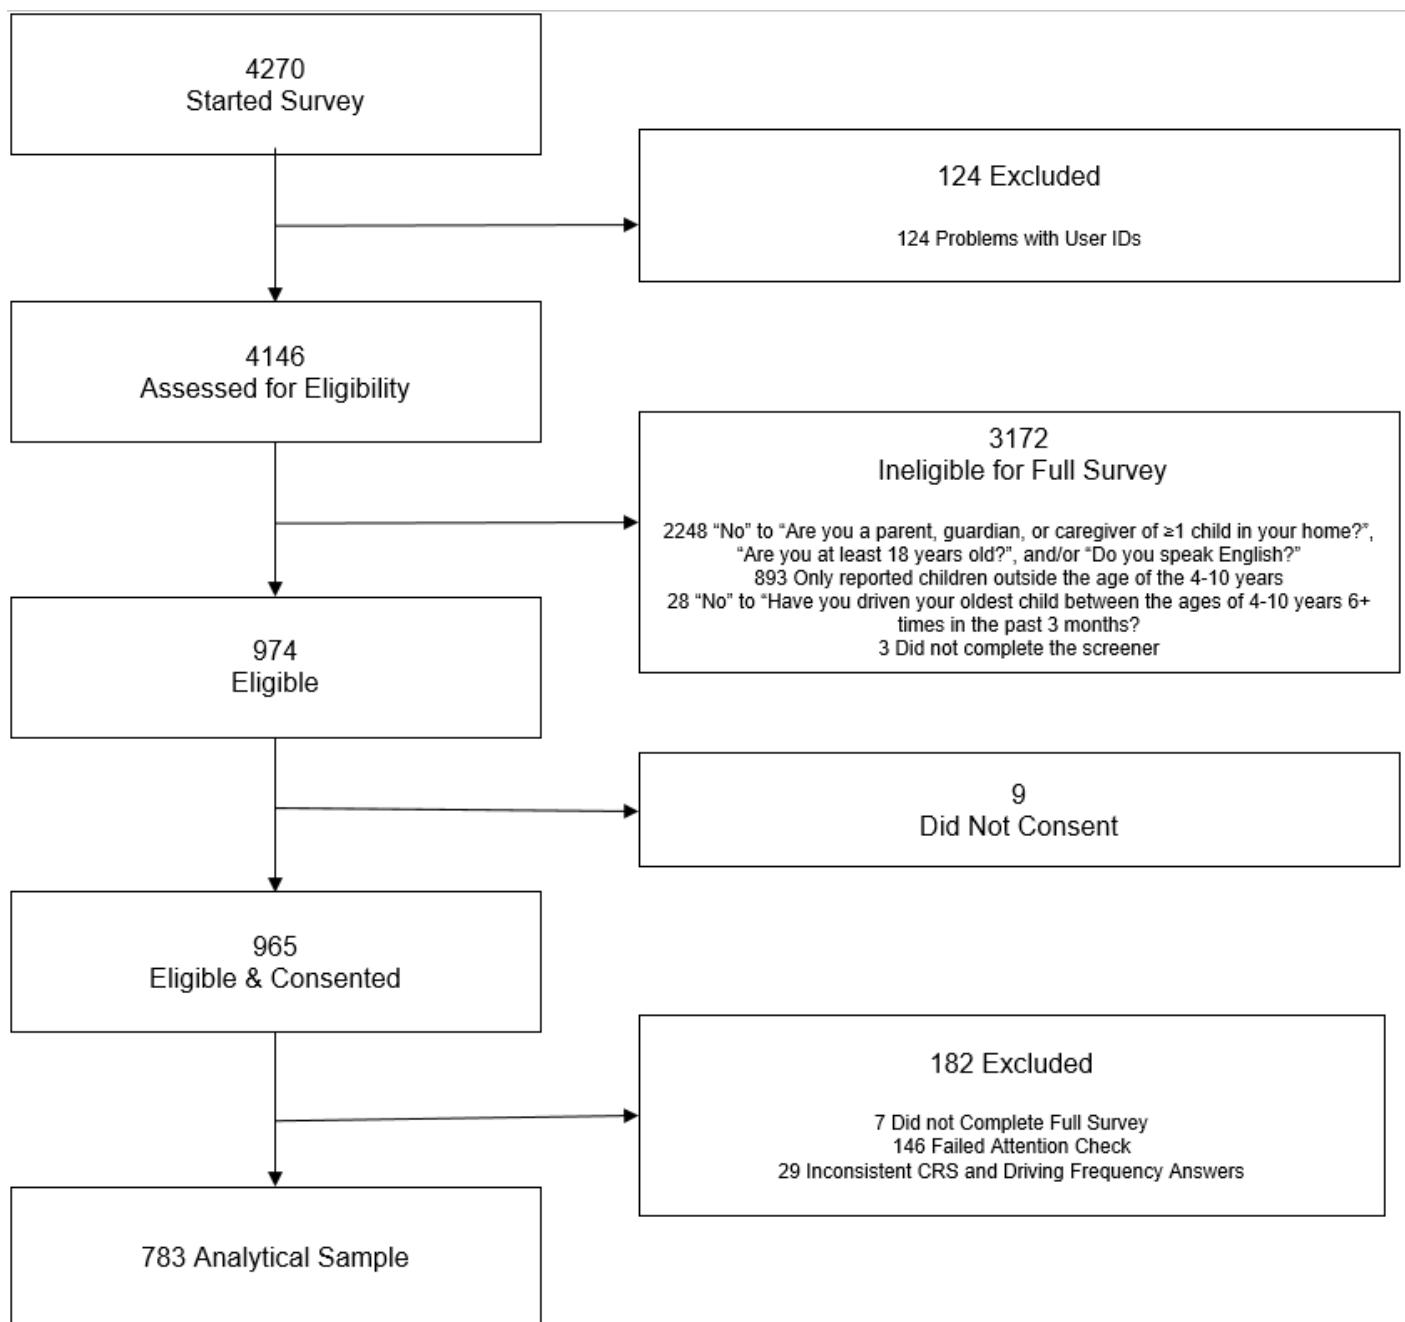

**Figure S2: Situational Use Sample n=409**

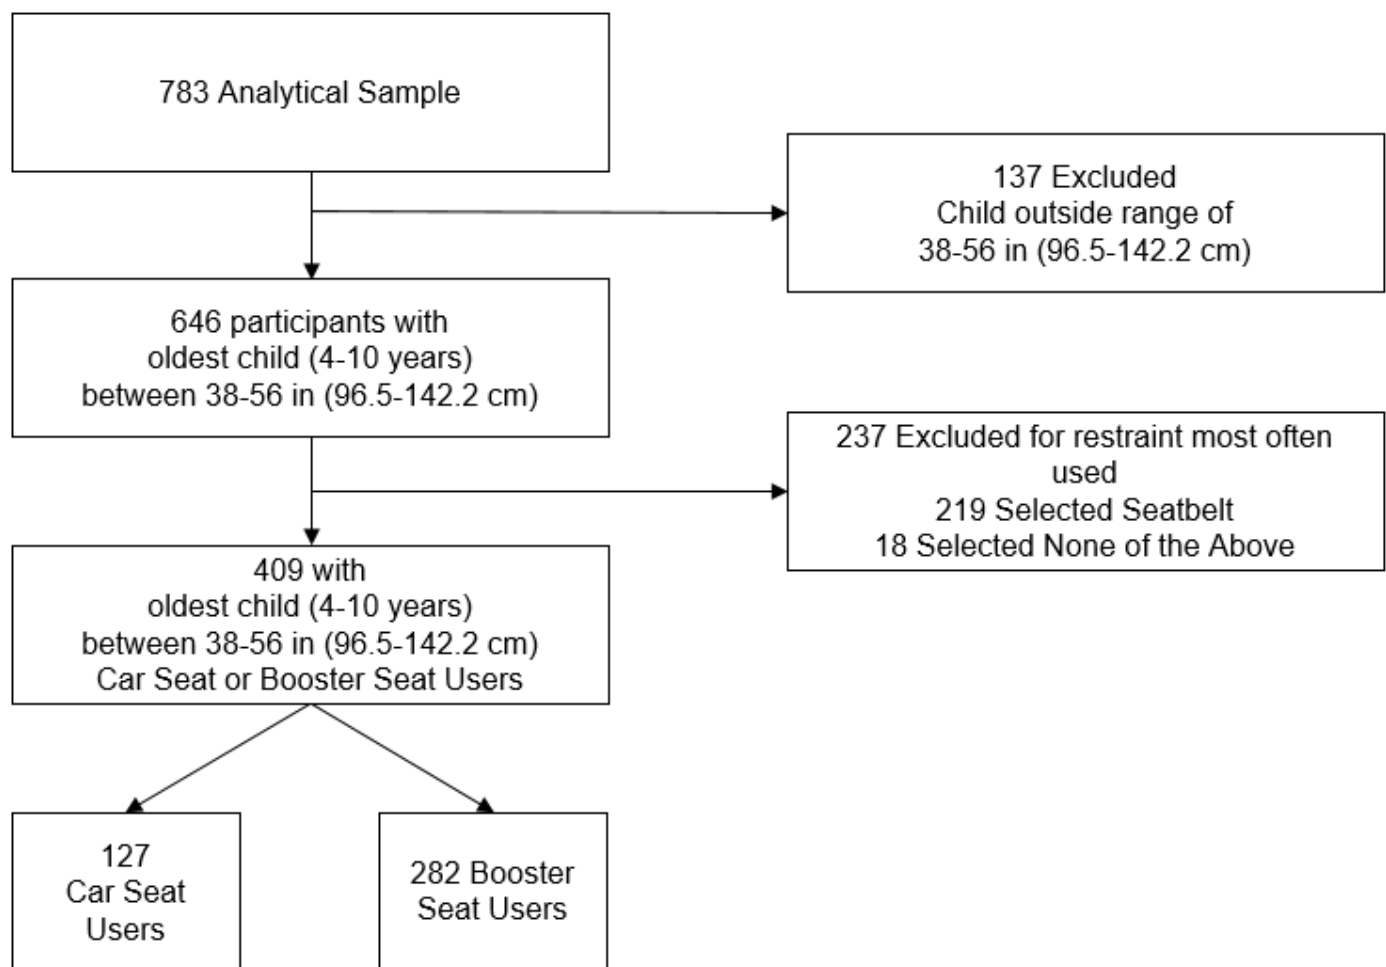

**Figure S3: Participant Carpooling Other Children: N=296**

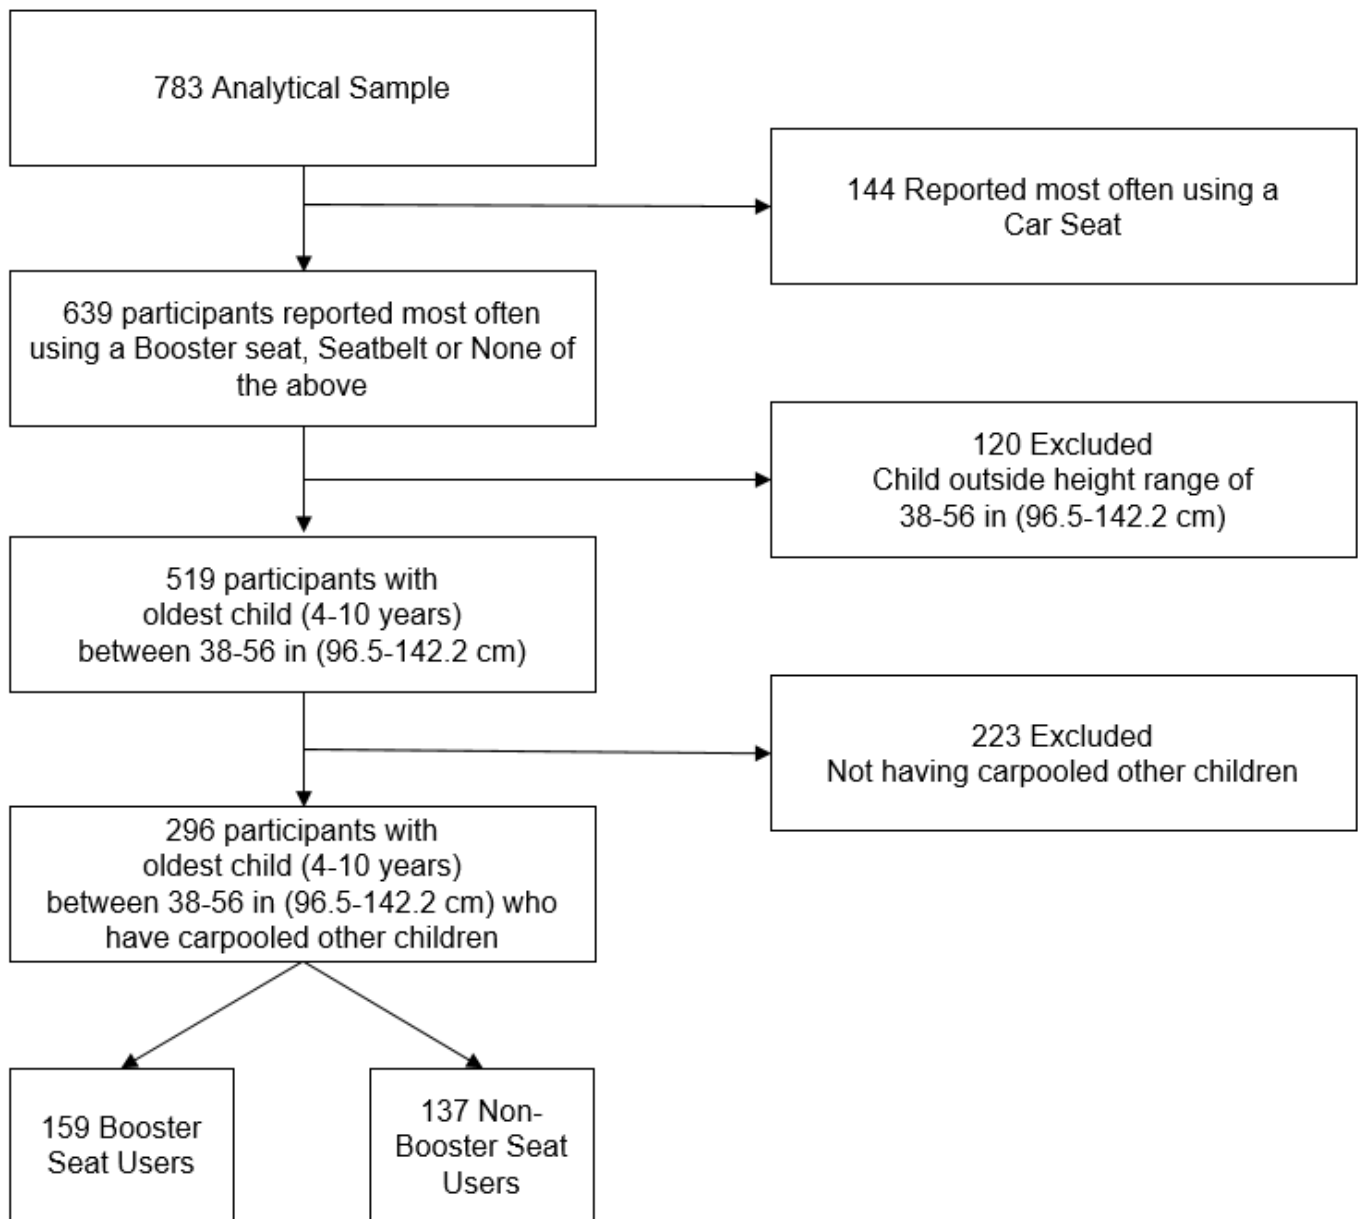

Figure S4: Participant’s Child being Carpooled by Another Person n=380

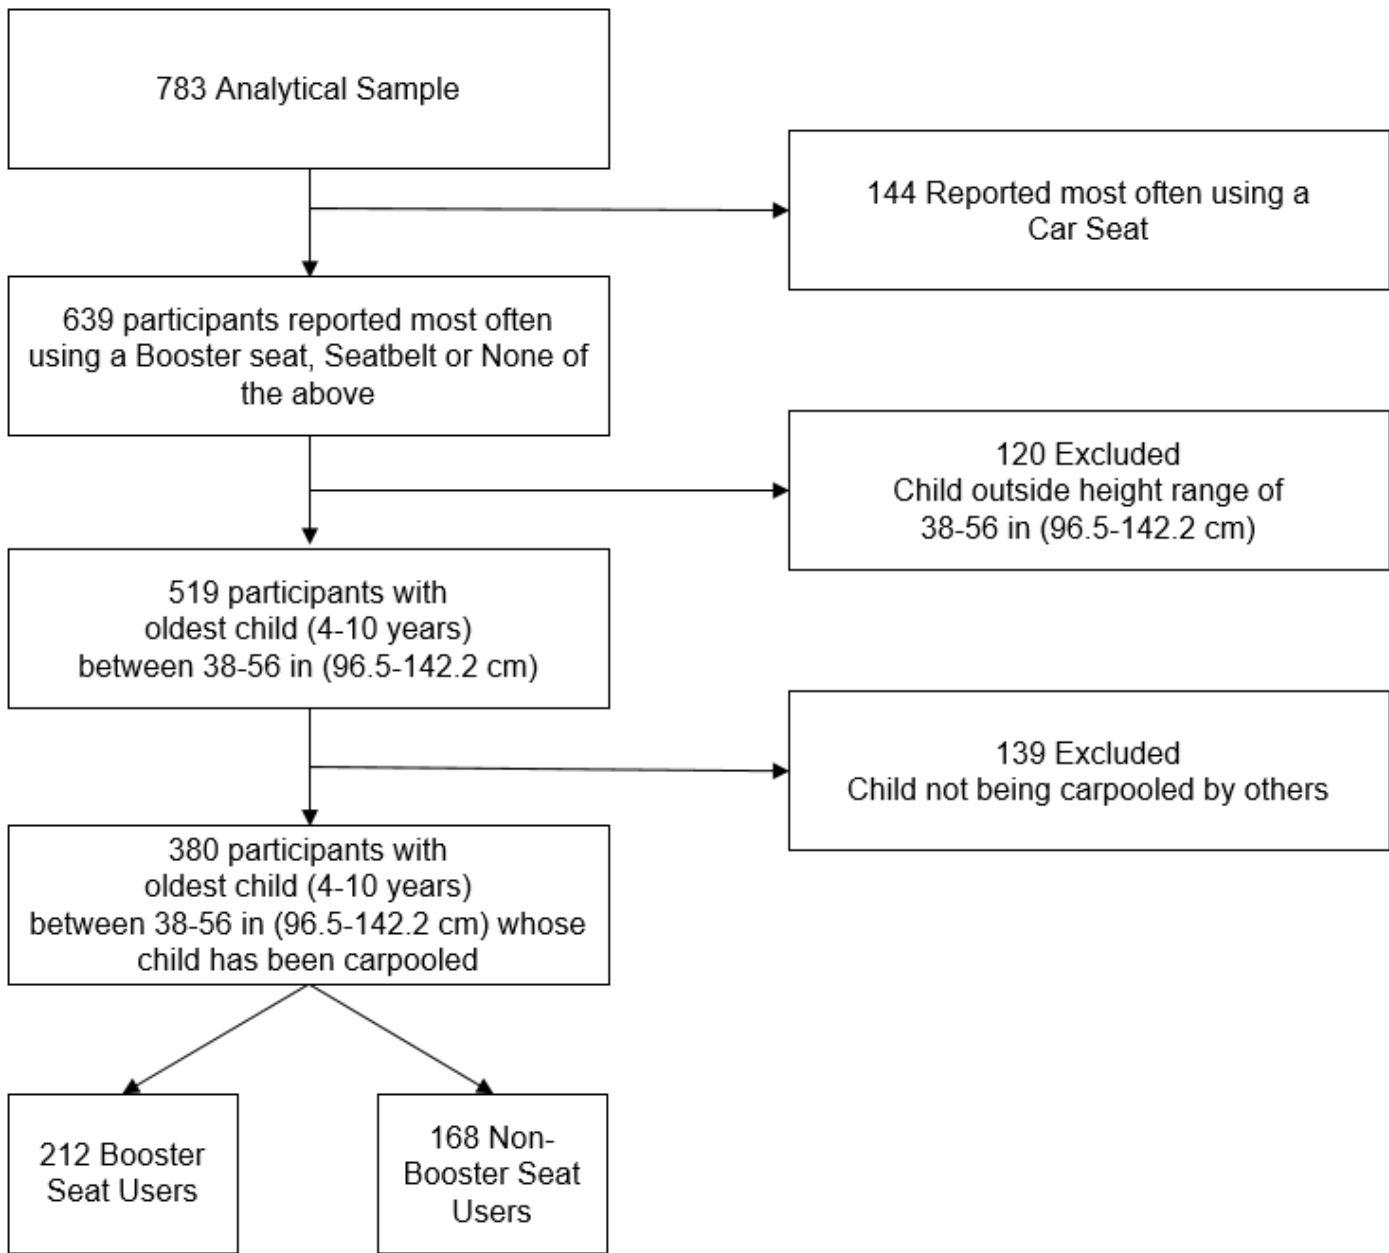

Supplement: s1 [file s1]
